# Supplementary material for: Diversity, Distribution, and Biogeography of Freshwater Fishes in Guangxi, China
Source: MDPI journal article supplement (doi:10.3390/ani12131626), 2022-06-24
Supplement: s1 [file s1]

Supplementary Table S1. List of freshwater fishes in Guangxi

| Order            | Family           | Valid                                                                     | Synonym                          | Xijiang River; |     |    |     |    |     |    |    |     |    | Rivers<br>flowing into |     | Yangtze River | Red<br>River |
|------------------|------------------|---------------------------------------------------------------------------|----------------------------------|----------------|-----|----|-----|----|-----|----|----|-----|----|------------------------|-----|---------------|--------------|
|                  |                  |                                                                           |                                  |                |     |    |     |    |     |    |    |     |    | the sea                |     |               |              |
|                  |                  |                                                                           |                                  | XR             | YYR | HR | LGR | LR | HSR | YR | ZR | NLR | OR | XZR                    | BDR |               |              |
| Myliobatiformes  | Dasyatidae       | <i>Hemityrion akajei</i> (Muller & Henle, 1841) <sup>1</sup>              | <i>Dasyatis akajei</i>           | +              | +   |    |     | +  |     |    | +  | +   |    |                        |     |               |              |
| Acipenseriformes | Acipenseridae    | <i>Acipenser sinensis</i> Gray, 1835 <sup>1</sup> (CR)                    |                                  | +              |     |    |     | +  |     |    |    |     |    |                        |     |               |              |
| Clupeiformes     | Clupeidae        | <i>Temualosa reevesii</i> Richardson, 1846 <sup>1</sup> (CR)              |                                  | +              |     |    |     |    |     |    |    |     |    |                        |     |               |              |
|                  |                  | <i>Clupanodon thrissa</i> (Linnaeus, 1758) <sup>2</sup>                   |                                  |                |     |    |     |    |     |    |    | +   | +  |                        |     |               |              |
|                  |                  | <i>Konosirus punctatus</i> (Temminck & Schlegel, 1846) <sup>2</sup>       |                                  |                |     |    |     |    |     |    |    | +   | +  |                        |     |               |              |
|                  | Engraulidae      | <i>Coilia grayi</i> Richardson, 1844 <sup>1</sup>                         |                                  | +              | +   |    |     |    |     |    |    |     |    |                        |     |               |              |
| Anguilliformes   | Anguillidae      | <i>Anguilla japonica</i> Temminck & Schlegel, 1846 <sup>1</sup> (EN)      |                                  | +              | +   |    | +   | +  | +   | +  |    |     |    |                        |     |               |              |
|                  |                  | <i>Anguilla marmorata</i> Quoy & Gaimard, 1824 <sup>1</sup> (EN)          |                                  | +              |     |    |     | +  | +   |    |    |     |    |                        |     | +             |              |
| Osmeriformes     | Plecoglossidae   | <i>Plecoglossus altivelis</i> Temminck & Schlegel, 1846 <sup>1</sup> (EN) |                                  |                |     |    |     |    |     |    |    |     |    |                        | +   |               |              |
|                  | Salangidae       | <i>Neosalanx taihuensis</i> Chen, 1956 <sup>3</sup>                       |                                  |                | +   |    | +   |    | +   |    | +  |     |    |                        |     |               |              |
|                  |                  | <i>Salanx chinensis</i> (Osbeck, 1765) <sup>1</sup>                       | <i>Leucosoma chinensi</i>        | +              | +   |    | +   |    |     | +  |    | +   |    |                        |     |               |              |
|                  |                  | <i>Salanx cuvieri</i> Valenciennes, 1817 <sup>2</sup>                     |                                  |                |     |    |     |    |     |    |    | +   | +  |                        |     |               |              |
| Characiformes    | Serrasalminidae  | <i>Piaractus brachypomus</i> Cuvier, 1817 <sup>3</sup>                    | <i>Colossoma<br/>brachypomus</i> |                | +   |    |     | +  | +   |    |    |     |    |                        |     |               |              |
|                  | Prochilodontidae | <i>Prochilodus lineatus</i> (Valenciennes, 1837) <sup>3</sup>             |                                  | +              | +   |    |     | +  | +   | +  | +  |     |    |                        |     |               |              |
| Cypriniformes    | Catostomidae     | <i>Myxocyprinus asiaticus</i> (Bleeker, 1864) <sup>3</sup> (CR)           |                                  |                | +   |    |     |    |     |    |    |     |    |                        |     |               |              |
|                  | Nemacheilidae    | * <i>Paranemachilus genilepis</i> Zhu, 1983                               |                                  |                |     |    |     |    |     |    |    | +   |    |                        |     |               |              |

|                                                                  |                                 |   |   |   |   |   |   |   |   |   |   |   |   |   |   |
|------------------------------------------------------------------|---------------------------------|---|---|---|---|---|---|---|---|---|---|---|---|---|---|
| * <i>Paranemacheilus pingguoensis</i> Gan, 2013                  |                                 |   |   |   |   |   |   |   | + |   |   |   |   |   |   |
| * <i>Paranemacheilus jinxiensis</i> (Zhu, Du & Chen, 2009)       | <i>Yunnanilus jinxiensis</i>    |   |   |   |   |   |   |   |   | + |   |   |   |   |   |
| <i>Traccatichthys pulcher</i> (Nichols & Pope, 1927)             | <i>Micronemacheilus pulcher</i> | + | + | + | + | + | + | + | + | + | + | + | + |   |   |
| * <i>Traccatichthys taeniatus</i> (Pellegrin & Chevey, 1936)     |                                 |   |   |   |   |   |   |   |   |   |   |   |   |   | + |
| * <i>Micronemacheilus pulcherrimus</i> (Yang, Chen & Lan, 2004)  | <i>Yunnanilus pulcherrimus</i>  |   |   |   |   |   |   | + |   |   |   |   |   |   |   |
| * <i>Heminoemacheilus parva</i> Zhu & Zhu, 2014                  |                                 |   |   |   |   |   |   |   |   | + |   |   |   |   |   |
| * <i>Heminoemacheilus longibarbatus</i> (Gan, Chen & Yang, 2007) | <i>Yunnanilus longibarbatus</i> |   |   |   |   |   |   | + |   |   |   |   |   |   |   |
| * <i>Heminoemacheilus bailianensis</i> (Yang, 2013)              | <i>Yunnanilus bailianensis</i>  |   |   |   |   |   | + |   |   |   |   |   |   |   |   |
| * <i>Heminoemacheilus hyalinus</i> Lan, Yang & Chen, 1996(EN)    |                                 |   |   |   |   |   |   | + |   |   |   |   |   |   |   |
| * <i>Heminoemacheilus zhengbaoshani</i> Zhu & Chao, 1987         |                                 |   |   |   |   |   |   | + |   |   |   |   |   |   |   |
| * <i>Yunnanilus retr dorsalis</i> ( Lan, Yang & Chen, 1995)      | <i>Oreonectes retr dorsalis</i> |   |   |   |   |   |   | + |   |   |   |   |   |   |   |
| * <i>Oreonectes polystigmus</i> Du, Chen & Yang, 2008            |                                 |   |   | + | + |   |   |   |   |   |   |   |   |   |   |
| * <i>Oreonectes luochengensis</i> Yang, Wu, Wei & Yang, 2011     |                                 |   |   |   | + |   |   |   |   |   |   |   |   |   |   |
| * <i>Oreonectes guananensis</i> Yang, Wei, Lan & Yang, 2011      |                                 |   |   |   |   |   | + |   |   |   |   |   |   |   |   |
| <i>Oreonectes platycephalus</i> Günther, 1868                    |                                 |   |   |   | + | + | + |   |   |   |   |   |   | + |   |
| * <i>Oreonectes anophthalmus</i> Zheng, 1981(EN)                 |                                 |   |   |   |   |   |   | + |   |   |   |   |   |   |   |
| * <i>Oreonectes guilinensis</i> Huang, Yang, Wu & Zhao, 2020     |                                 |   |   |   | + |   |   |   |   |   |   |   |   |   |   |
| <i>Schistura incerta</i> (Nichols, 1931)                         |                                 |   |   |   | + | + | + | + |   |   |   |   |   | + |   |
| <i>Schistura fasciolatus</i> (Nichols & Pope, 1927)              |                                 | + | + | + | + | + | + | + | + | + | + | + | + | + | + |
| * <i>Schistura paraxena</i> Endruweit, 2017                      |                                 |   |   |   |   |   | + |   |   |   |   |   |   |   |   |
| * <i>Schistura alboguttata</i> Cao & Pope, 2018                  |                                 |   |   |   |   |   |   | + |   |   |   |   |   |   |   |

|                                                                        |                                                                        |   |   |
|------------------------------------------------------------------------|------------------------------------------------------------------------|---|---|
| * <i>Triplophysa longipectoralis</i> Zheng, Du, Chen & Yang, 2009      |                                                                        | + |   |
| * <i>Triplophysa huapingensis</i> Zheng, Yang & Chen, 2012             |                                                                        |   | + |
| * <i>Triplophysa macrocephala</i> Yang, Wu & Yang, 2012                |                                                                        | + |   |
| * <i>Triplophysa langpingensis</i> Yang, 2013                          |                                                                        |   | + |
| * <i>Triplophysa fengshanensis</i> Lan, 2013                           |                                                                        |   | + |
| * <i>Triplophysa tianlinensis</i> Li, Li, Lan & Du, 2016               |                                                                        |   | + |
| * <i>Triplophysa tianlinensis</i> Li, Lan, Chen & Du, 2017             |                                                                        |   | + |
| * <i>Triplophysa flavicorpus</i> Yang, Chen & Lan, 2004                |                                                                        |   | + |
| * <i>Triplophysa nandanensis</i> Lan, Yang & Chen, 1995                |                                                                        |   | + |
| * <i>Triplophysa tianeensis</i> Chen, Cui & Yang, 2004(VU)             |                                                                        |   | + |
| * <i>Triplophysa anshuiensis</i> Wu, Wei, Lan & Du, 2018               |                                                                        |   | + |
| * <i>Troglonectes furcicaudalis</i> (Zhu & Chao, 1987) (VU)            | <i>Oreonectes</i><br><i>furcicaudalis</i>                              | + |   |
| * <i>Troglonectes macrolepis</i> (Huang, Du, Chen & Yang, 2009)        |                                                                        | + |   |
| * <i>Troglonectes lingyunensis</i> (Liao, Wang & Luo, 1997) (VU)       | <i>Schistura</i><br><i>lingyunensis</i>                                |   | + |
| * <i>Troglonectes longibaratus</i> (Chen, Yang, Sket & Aljancic, 1998) |                                                                        |   | + |
| * <i>Troglonectes microphthalmus</i> (Du, Chen & Yang 2008)            |                                                                        | + |   |
| * <i>Troglonectes translucens</i> (Zhang, Zhao & Zhang, 2006)          |                                                                        |   | + |
| * <i>Troglonectes donglanensis</i> (Wu, 2013)                          |                                                                        |   | + |
| * <i>Troglonectes duanensis</i> (Lan, 2013)                            |                                                                        |   | + |
| * <i>Troglonectes dongganensis</i> Yang, 2013                          |                                                                        | + |   |
| * <i>Troglonectes huanjiangensis</i> (Yang, Wu & Lan, 2011)            | <i>Oreonectes elongatus</i><br><i>Troglonectes</i><br><i>elongatus</i> | + |   |

[illegible]

|            |                                                             |   |   |   |   |   |   |   |   |   |   |   |   |
|------------|-------------------------------------------------------------|---|---|---|---|---|---|---|---|---|---|---|---|
|            | * <i>Cobitis australis</i> Chen, Chen & He, 2013            |   |   |   |   |   | + |   |   |   |   |   |   |
|            | * <i>Bibarba parvocolus</i> (Wu,Yangand &Xiu, 2015)         |   |   |   |   |   |   |   | + |   |   |   |   |
|            | * <i>Bibarba Bibarba</i> (Chen & Chen, 2007)                |   |   |   |   |   |   |   |   | + |   |   |   |
|            | <i>Misgurnus anguillicaudatus</i> (Cantor, 1842)            | + | + | + | + | + | + |   | + |   | + | + | + |
|            | <i>Paramisgurnus dabryanus</i> Dabry de Thiersant, 1872     |   |   |   | + | + |   |   |   |   |   | + |   |
| Cyprinidae | <i>Parazacco fasciatus</i> (Koller, 1927)                   |   |   |   |   |   |   |   |   |   | + |   |   |
|            | <i>Zacco acanthogenys</i> (Boulenger, 1901)                 |   |   |   |   |   |   |   |   |   |   |   |   |
|            | <i>Zacco platypus</i>                                       | + |   | + | + | + | + | + | + | + | + | + |   |
|            | <i>Opsariichthys bidens</i> Günther, 1873                   | + | + | + | + | + | + | + | + | + | + | + | + |
|            | <i>Aphyocypris chinensis</i> Günther, 1868                  |   |   |   |   |   |   |   |   |   |   | + |   |
|            | * <i>Aphyocypris pulchrilineata</i> Zhu, Zhao & Huang, 2013 |   |   |   |   |   |   | + |   |   |   |   |   |
|            | * <i>Aphyocypris arcus</i> (Lin, 1931)                      |   |   |   |   | + | + | + |   |   |   |   |   |
|            | <i>Nicholsicypris normalis</i> Nichols & Pope, 1927         |   |   |   |   |   |   |   |   | + | + | + |   |
|            | <i>normalis</i>                                             |   |   |   |   |   |   |   |   |   |   |   |   |
|            | <i>Rasbora steineri</i> Nichols & Pope, 1927                |   |   |   | + | + | + |   | + | + | + |   |   |
|            | <i>Tanichthys albonubes</i> Lin, 1932(CR)                   | + |   |   |   |   |   |   |   |   |   |   |   |
|            | <i>Mylopharyngodon piceus</i> (Richardson, 1846)            | + | + | + | + | + | + |   |   |   |   | + |   |
|            | <i>Luciobrama macrocephalus</i> (Lacépède, 1803)(CR)        | + | + |   |   |   | + |   |   |   |   |   |   |
|            | <i>Ctenopharyngodon idella</i> (Valenciennes, 1844)         | + | + | + | + | + | + | + | + | + |   | + |   |
|            | <i>Squaliobarbus curriculus</i> (Richardson, 1846)          | + | + |   | + | + | + | + | + | + | + |   |   |
|            | * <i>Atrilinea macrops</i> (Lin, 1931)(CR)                  |   |   |   |   | + |   |   |   |   |   |   |   |
|            | <i>Ochetobius elongatus</i> (Kner, 1867)(CR)                | + | + |   | + | + | + |   | + |   |   |   |   |
|            | <i>Elopichthys bambusa</i> (Richardson, 1845)               | + | + |   |   | + | + | + | + | + |   |   |   |
|            | <i>Tinca tinca</i> (Linnaeus, 1758) <sup>3</sup>            | + |   |   |   |   |   |   |   |   |   |   |   |
|            | <i>Metzia lineata</i> (Pellegrin, 1907)                     |   |   |   |   |   |   |   |   |   |   |   |   |
|            | <i>Rasborinus lineatus</i>                                  | + | + |   | + | + | + | + | + | + | + |   |   |
|            | <i>Metzia formosae</i> (Oshima, 1920) (VU)                  |   |   |   |   |   |   | + |   | + |   | + |   |
|            | <i>Rasborinus formosae</i>                                  | + | + |   |   |   |   | + |   |   |   |   |   |
|            | * <i>Metzia parva</i> Luo, Sullivan, Zhao & Peng, 2015      |   |   |   |   |   |   | + |   |   |   |   |   |

[illegible]

[illegible]

[illegible]



|                                                                     |   |   |   |   |
|---------------------------------------------------------------------|---|---|---|---|
| <i>Sinocyclocheilus macrolepis</i> (Wang, 1989)                     |   |   | + | + |
| * <i>Sinocyclocheilus guilinensis</i> Ji, 1985                      |   |   | + |   |
| * <i>Sinocyclocheilus jii</i> Zhang & Dai, 1992                     | + | + |   |   |
| * <i>Sinocyclocheilus huanjiangensis</i> Wu, Gan & Li, 2010         |   |   | + |   |
| * <i>Sinocyclocheilus yishanensis</i> Li & Lan, 1992                |   |   | + |   |
| * <i>Sinocyclocheilus brevibarbus</i> Zhao, Lan & Zhang, 2009       |   |   |   | + |
| * <i>Sinocyclocheilus jiuxuensis</i> (Li & Lan, 2003)               |   |   |   | + |
| * <i>Sinocyclocheilus mashanensis</i> Wu, Liao & Li, 2010           |   |   |   | + |
| * <i>Sinocyclocheilus anophthalmus</i> Li, 1989                     |   |   |   | + |
| * <i>Sinocyclocheilus altishoulderus</i> ( Li & Lan, 1992)          |   |   |   | + |
| * <i>Sinocyclocheilus lingyunensis</i> ( Li, Xiao & Luo, 2000)(VU)  |   |   |   | + |
| * <i>Sinocyclocheilus macrophthalmus</i> (Zhang & Zhao, 2001)       |   |   |   | + |
| * <i>Sinocyclocheilus multipunctatus</i> (Pellegrin, 1931)          |   |   | + |   |
| * <i>Sinocyclocheilus longibarbus</i> Wang, 1989                    |   |   | + | + |
| * <i>Sinocyclocheilus donglanensis</i> Zhao, Watanabe & Zhang, 2006 |   |   |   | + |
| * <i>Sinocyclocheilus brevis</i> ( Lan & Chen, 1992)                |   |   | + |   |
| * <i>Sinocyclocheilus guangxiensis</i> Zhou & Li, 1998              |   |   |   | + |
| * <i>Sinocyclocheilus tianlinensis</i> Zhou, Zhang & He, 2004(VU)   |   |   |   | + |
| * <i>Sinocyclocheilus anatirostris</i> Lin & Luo, 1986(VU)          |   |   |   | + |
| * <i>Sinocyclocheilus flexuosdorsalis</i> Zhu & Zhu, 2012           |   |   |   | + |
| * <i>Sinocyclocheilus furcodorsalis</i> Chen, Yang & Lan, 1997(VU)  |   |   |   | + |
| * <i>Sinocyclocheilus xunleensis</i> Lan, Zhao & Zhang, 2004(VU)    |   |   | + |   |
| * <i>Sinocyclocheilus jinxiensis</i> (Zheng, Xiu & Yang, 2013)      |   |   |   | + |
| * <i>Sinocyclocheilus luolouensis</i> Lan, 2013                     |   |   |   | + |
| * <i>Sinocyclocheilus anshuiensis</i> Gan, Wu, Wei & Yang, 2013     |   |   |   | + |
| * <i>Sinocyclocheilus ronganensis</i> Luo, Huang & Wen, 2016        |   |   | + |   |

[illegible]

|                                                                    |                                  |   |   |   |   |   |   |   |   |   |   |
|--------------------------------------------------------------------|----------------------------------|---|---|---|---|---|---|---|---|---|---|
| <i>Onychostoma lini</i> (Wu, 1939)                                 |                                  |   |   |   | + | + | + |   |   |   |   |
| <i>Onychostoma ovalis rhomboides</i> (Tang, 1942)                  |                                  |   | + |   | + | + | + | + | + |   |   |
| <i>Onychostoma rarum</i> (Lin, 1933)(VU)                           |                                  |   | + |   | + | + | + | + | + |   |   |
| <i>Tor brevifilis</i> (Peters, 1880)                               |                                  | + |   |   | + | + | + | + | + |   |   |
| <i>Tor zonatus</i> Lin, 1935(VU)                                   |                                  | + | + |   | + | + | + | + | + |   |   |
| <i>Bangana discognathoides</i> (Nichols & Pope, 1927) (CR)         |                                  |   |   |   |   |   | + | + |   |   |   |
| <i>Decorus decora</i> (Peters, 1881) (CR)                          | <i>Sinilabeo decorus</i>         |   | + |   | + | + | + | + | + | + |   |
| * <i>Lanlabeo duanensis</i> Yao, You & Peng, 2018                  |                                  |   |   |   |   |   |   | + |   |   |   |
| * <i>Zuojiangia jingxiensis</i> Zheng, You, Yang & Peng, 2018      |                                  |   |   |   |   |   |   |   |   |   | + |
| <i>Altigena wui</i> (Zheng & Chen, 1983) (EN)                      | <i>Sinilabeo wui</i>             |   |   |   | + | + | + | + |   |   |   |
| <i>Labeo rohita</i> (Hamilton, 1822) <sup>3</sup>                  |                                  |   | + |   | + | + | + |   |   |   |   |
| <i>Cirrhinus molitorella</i> (Valenciennes, 1844)                  |                                  | + | + | + | + | + | + | + | + | + | + |
| <i>Cirrhinus mrigala</i> (Hamilton, 1822) <sup>3</sup>             |                                  | + | + |   |   |   |   |   |   |   |   |
| <i>Osteochilus salsburyi</i> Nichols & Pope, 1927                  |                                  | + | + | + | + | + | + | + | + | + | + |
| <i>Rectoris posehensis</i> Lin, 1935                               |                                  | + |   |   | + | + | + | + | + |   |   |
| * <i>Rectoris longibarbus</i> Zhu, Zhang & Lan, 2012               |                                  |   |   |   |   |   |   |   |   | + |   |
| * <i>Sinigarra napoense</i> Zhang & Zhou, 2012                     |                                  |   |   |   |   |   |   |   |   | + |   |
| <i>Pseudocrossocheilus bamaensis</i> (Fang, 1981)                  |                                  |   |   |   |   |   | + | + |   |   |   |
| * <i>Pseudocrossocheilus liuchengensis</i> (Liang, Liu & Wu, 1987) |                                  |   |   |   |   |   | + | + |   |   |   |
| <i>Parasinilabeo assimilis</i> Wu & Yao, 1977 (VU)                 | <i>Parasinilabeo longicarpus</i> | + |   | + | + | + | + | + |   |   | + |
| * <i>Parasinilabeo longiventralis</i> Huang, Chen & Yang, 2007     |                                  |   |   | + |   |   |   |   |   |   |   |
| * <i>Parasinilabeo longibarbus</i> Zhu, Lan & Zhang, 2006          |                                  |   |   | + |   |   |   |   |   |   |   |
| * <i>Stenorynchoacrum xijiangensis</i> Huang, Yang & Chen, 2014    |                                  |   |   |   | + |   |   |   |   |   |   |
| <i>Semilabeo notabilis</i> Peters, 1880(EN)                        |                                  | + | + |   | + | + | + | + | + |   |   |
| <i>Semilabeo obscurus</i> Lin, 1981(VU)                            |                                  |   |   |   |   |   | + | + |   |   |   |

[illegible]

[illegible]

|                 |                                                                    |                                   |   |   |   |   |   |   |   |   |   |   |   |
|-----------------|--------------------------------------------------------------------|-----------------------------------|---|---|---|---|---|---|---|---|---|---|---|
|                 | <i>Silurus asotus</i> Linnaeus, 1758                               |                                   | + | + | + | + | + | + | + | + | + | + | + |
|                 | <i>Silurus duanensis</i> Hu, Lan & Zhang, 2004                     |                                   |   |   |   | + |   | + |   |   |   |   |   |
|                 | <i>Silurus meridionalis</i> Chen, 1977                             |                                   |   |   |   | + | + |   |   | + |   |   | + |
| Clariidae       | <i>Clarias fuscus</i> (Lacepède, 1803)                             |                                   | + | + | + | + | + | + | + | + |   | + | + |
|                 | <i>Clarias gariepinus</i> (Burchell, 1822) <sup>3</sup>            |                                   |   | + |   |   | + | + | + |   |   |   |   |
| Cranoglanididae | <i>Cranoglanis boudierus</i> (Richardson, 1846) (EN)               |                                   | + | + |   | + | + | + | + | + |   |   |   |
| Pangasiidae     | <i>Sinopangasius semicultratus</i> Fang & Chaux, 1949 <sup>2</sup> |                                   |   |   |   |   |   |   |   |   | ? | + |   |
| Bagridae        | <i>Tachysurus fulvidraco</i> Bleeker, 1864                         | <i>Pelteobagrus fulvidraco</i>    | + | + | + | + | + |   |   | + |   | + | + |
|                 | <i>Tachysurus virgatus</i> (Oshima, 1926)                          | <i>Leiocassis virgatus</i>        | + |   |   | + | + | + |   |   |   | + |   |
|                 | <i>Tachysurus argentivittatus</i> (Regan, 1905)                    | <i>Leiocassis argentivittatus</i> | + | + |   |   | + |   |   |   |   |   |   |
|                 | <i>Tachysurus intermedius</i> Nichols & Pope, 1927                 | <i>Pelteobagrus intermedius</i>   | + | + |   | + |   | + |   | + | + | + |   |
|                 | <i>Tachysurus vachelli</i> (Richardson, 1846)                      | <i>Pelteobagrus vachelli</i>      | + | + | + | + | + | + | + | + |   |   | + |
|                 | <i>Tachysurus crassilabris</i> (Günther, 1864)                     | <i>Leiocassis crassilabris</i>    | + | + | + | + | + | + | + | + | + | + | + |
|                 | <i>Tachysurus tenuifurcatus</i> (Nichols, 1931)                    | <i>Leiocassis tenuifurcatus</i>   |   |   |   | + |   |   |   |   |   |   |   |
|                 | <i>Tachysurus eupogon</i> (Boulenger, 1892) (CR)                   | <i>Pelteobagrus eupogon</i>       |   |   |   | + |   |   |   |   |   |   |   |
|                 | <i>Tachysurus kyphus</i> Mai, 1978                                 |                                   |   |   |   | + |   |   |   |   |   | + |   |
|                 | <i>Tachysurus gracilis</i> Li, Chen & Chan, 2005                   | <i>Pseudobagrus pratti</i>        |   |   |   | + | + |   |   |   |   |   | + |
|                 | <i>Tachysurus brachyrhabdion</i>                                   | <i>Pseudobagrus adiposalis</i>    |   |   |   | + |   |   |   |   |   |   | + |

|                    |                  |                                                                     |                             |   |   |   |   |   |   |   |   |   |   |
|--------------------|------------------|---------------------------------------------------------------------|-----------------------------|---|---|---|---|---|---|---|---|---|---|
|                    |                  | <i>Tachysurus lani</i> Chen, 2010                                   | <i>Pseudobagrus</i>         |   |   |   |   | + | + |   |   |   | + |
|                    |                  |                                                                     | <i>albomarginatus</i>       |   |   |   |   |   |   |   |   |   |   |
|                    |                  | <i>Hemibagrus guttatus</i> (Lacepède, 1803)                         | <i>Mystus guttatus</i>      | + | + | + | + | + | + | + | + | + | + |
|                    |                  | <i>Hemibagrus pluriradiatus</i> (Vaillant, 1892)                    | <i>Mystus pluriradiatus</i> |   |   |   |   |   |   |   |   | + | + |
|                    |                  | <i>Hemibagrus macropterus</i> Bleeker, 1870                         | <i>Mystus macropterus</i>   | + |   |   | + | + | + |   | + | + | + |
|                    |                  | <i>Mystus gulio</i> (Hamilton, 1822)                                |                             |   |   |   |   |   |   |   |   | + |   |
|                    | Sisoridae        | <i>Bagarius yarrelli</i> (Sykes, 1839)                              |                             |   |   |   |   |   |   |   |   |   | + |
|                    |                  | <i>Glyptothorax sinensis</i> (Regan, 1908)                          | <i>Glyptothorax</i>         |   |   | + | + | + | + | + | + | + | + |
|                    |                  |                                                                     | <i>fokiensis</i>            |   |   |   |   |   |   |   |   |   |   |
|                    |                  | <i>Pareuchiloglanis longicauda</i> (Yue, 1981)                      |                             |   |   | + |   | + |   |   |   |   |   |
|                    | Amblycipitidae   | <i>Liobagrus anguillicauda</i> Nichols, 1926                        |                             |   |   |   |   | + |   |   |   | + |   |
|                    |                  | <i>Xiurenbagrus xiurenensis</i> (Yue, 1981)                         |                             |   |   | + | + |   |   | + |   |   |   |
|                    |                  | * <i>Xiurenbagrus gigas</i> Zhao, Lan & Zhang, 2004                 |                             |   |   |   |   |   | + |   |   |   |   |
|                    |                  | * <i>Xiurenbagrus dorsalis</i> Xiu, Yang & Zheng, 2014              |                             |   |   | + |   |   |   |   |   |   |   |
|                    | Ictaluridae      | <i>Ictalurus Punetaus</i> (Rafinesque, 1818) <sup>3</sup>           |                             | + | + | + | + | + | + | + | + |   |   |
|                    | Loricariidae     | <i>Pterygoplichthys pardalis</i> (Castelnau, 1855) <sup>3</sup>     |                             | + | + |   |   | + | + | + |   |   |   |
| Mugiliformes       | Mugilidae        | <i>liza haematocheilus</i> (Temminck & Schlegel, 1845) <sup>2</sup> |                             |   |   |   |   |   |   |   |   | + |   |
| Beloniformes       | Hemiramphidae    | <i>Hyporhamphus intermedius</i> (Cantor, 1842) <sup>2</sup>         |                             | + |   |   |   |   |   |   |   |   |   |
|                    | Adrianichthyidae | <i>Oryzias latipes</i> (Temminck & Schlegel, 1846)                  |                             |   | + |   |   |   | + |   |   |   |   |
|                    |                  | <i>Oryzias pectoralis</i> Roberts, 1998                             |                             |   |   |   |   | + |   |   |   |   |   |
| Cyprinodontiformes | Poeciliidae      | <i>Gambusia affinis</i> (Baird & Girard, 1853) <sup>3</sup>         |                             |   | + |   | + | + | + | + | + | + | + |
| Synbranchiformes   | Synbranchidae    | <i>Monopterus albus</i> (Zuiew, 1793)                               |                             | + | + | + | + | + | + | + | + | + | + |
|                    | Mastacembelidae  | <i>Mastacembelus aculeatus</i> (Bloch, 1786)                        |                             |   | + |   | + | + |   | + | + | + | + |
|                    |                  | <i>Mastacembelus armatus</i> (Lacepède, 1800)                       |                             | + | + | + | + | + | + | + | + | + | + |
| Perciformes        | Lateolabracidae  | <i>Lateolabrax japonicus</i> (Cuvier, 1828) <sup>2</sup>            |                             | + |   |   | + |   |   |   |   | + |   |

[illegible]



|                   |                |                                                            |   |   |   |   |   |   |   |   |   |   |   |
|-------------------|----------------|------------------------------------------------------------|---|---|---|---|---|---|---|---|---|---|---|
| Anabantiformes    | Anabantidae    | <i>Rhinogobius giurinus</i> (Rutter, 1897)                 | + | + | + | + | + | + | + | + | + | + | + |
|                   |                | <i>Rhinogobius duospilus</i> (Herre, 1935)                 |   |   |   | + | + | + | + | + |   |   | + |
|                   |                | <i>Rhinogobius filamentosus</i> (Wu, 1939)                 |   |   |   | + | + | + |   | + |   |   | + |
|                   |                | <i>Rhinogobius leavelli</i> (Herre, 1935)                  | + |   |   | + | + | + |   | + |   |   | + |
|                   |                | * <i>Rhinogobius yaoshanensis</i> (Luo, 1989)(EN)          |   |   |   |   |   | + |   |   |   |   |   |
|                   |                | * <i>Rhinogobius parvus</i> (Luo, 1989)(EN)                |   |   |   | + |   |   |   | + |   |   |   |
|                   | Osphronemidae  | <i>Anabas testudineus</i> (Bloch, 1792)                    |   |   |   |   |   |   |   |   |   | + |   |
|                   |                | <i>Macropodus opercularis</i> (Linnaeus, 1758)             | + | + |   | + | + | + | + | + | + | + | + |
|                   | Channidae      | <i>Macropodus ocellatus</i> Cantor, 1842                   |   |   |   |   |   |   | + |   |   |   |   |
|                   |                | <i>Macropodus chinensis</i>                                |   |   |   |   |   |   |   |   |   |   |   |
|                   |                | <i>Channa maculate</i> (Lacepède, 1801)                    | + | + | + | + | + | + | + | + | + | + | + |
|                   |                | <i>Channa gachua</i> (Hamilton, 1822)                      |   |   | + | + |   |   |   |   |   |   |   |
|                   |                | <i>Channa asiatica</i> (Linnaeus, 1758)                    | + | + | + | + | + | + | + | + | + | + | + |
|                   |                | * <i>Channa nox</i> Zhang, Musikasinthorn & Watanabe, 2002 |   |   |   |   |   |   |   |   | + |   |   |
| Pleuronectiformes | Cynoglossidae  | <i>Cynoglossus trigrammus</i> Günther, 1862 <sup>2</sup>   | + |   |   |   |   |   |   |   |   |   |   |
| Tetraodontiformes | Tetraodontidae | <i>Takifugu ocellatus</i> (Linnaeus, 1758) <sup>2</sup>    | + |   |   |   |   | + |   |   |   |   |   |

(XR: Xunjiang River; YYR: Yongjiang River and Yujiang River; HR: Hejiang River; LGR: Lijiang River and Guijiang River; LR: Liujiang River; HSR: Hongshui River; YR: Youjiang River; ZR: Zuojiang River; NLR: Nanliujiang River; OR: Other southern rivers flowing to the sea; XZR: Xiangjiang River and Zijiang River; BDR: Baidu River)

\*Species endemic to Guangxi

<sup>1</sup>Migratory fish

<sup>2</sup>Estuary fish

<sup>3</sup>Exotic fish

(CR) Critically Endangered fishes in China

(EN) Endangered fishes in China

(VU) Vulnerable fishes in China
